# Supplementary material for: Remnant Cholesterol and Ischemic Cardiovascular Disease: A Cross-Sectional Study in Northern China
Source: Research Square preprint supplement (doi:10.21203/rs.3.rs-1140711/v1), 2021-12-07
Supplement: Supplementary file 1 [file 7d5b656c67057007480a6f59.docx]

**Supplementary material**


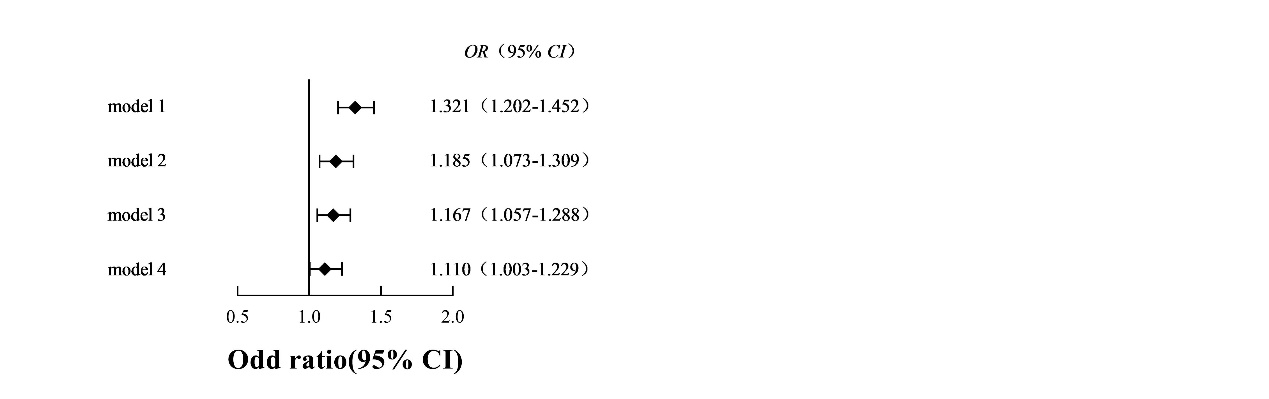


Figure S1 Logistic regression analysis of the relationship between remnant cholesterol and ischemic cardiovascular disease (RC was analyzed as a continuous variable)

Model 1: adjusted for gender+ age. Model 2: Model 1+current smoker+ obesity+ hypertension+ diabetes+ lipid-lowering therapy. Model 3: Model 2+ low-density lipoprotein cholesterol. Model 4: Model 2+ high-density lipoprotein cholesterol.


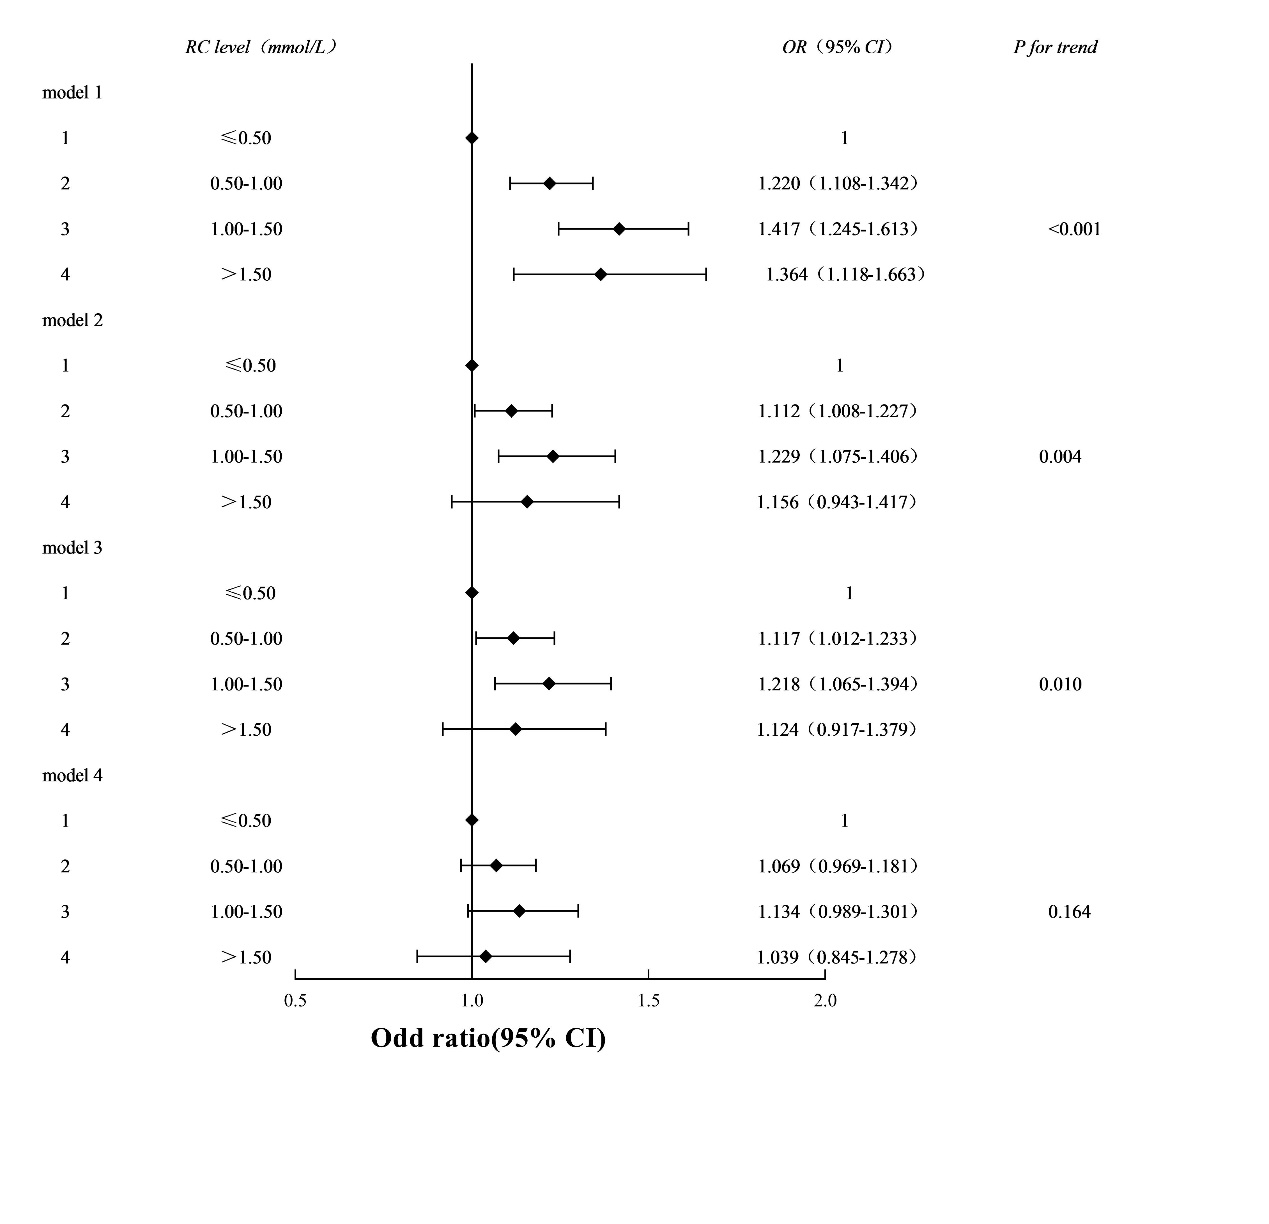


Figure S2 Logistic regression analysis of the relationship between remnant cholesterol and ischemic cardiovascular disease (RC was analyzed by grouping by clinical boundaries)

Model 1: adjusted for gender+ age. Model 2: Model 1+current smoker+ obesity+ hypertension+ diabetes+ lipid-lowering therapy. Model 3: Model 2+ low-density lipoprotein cholesterol. Model 4: Model 2+ high-density lipoprotein cholesterol.


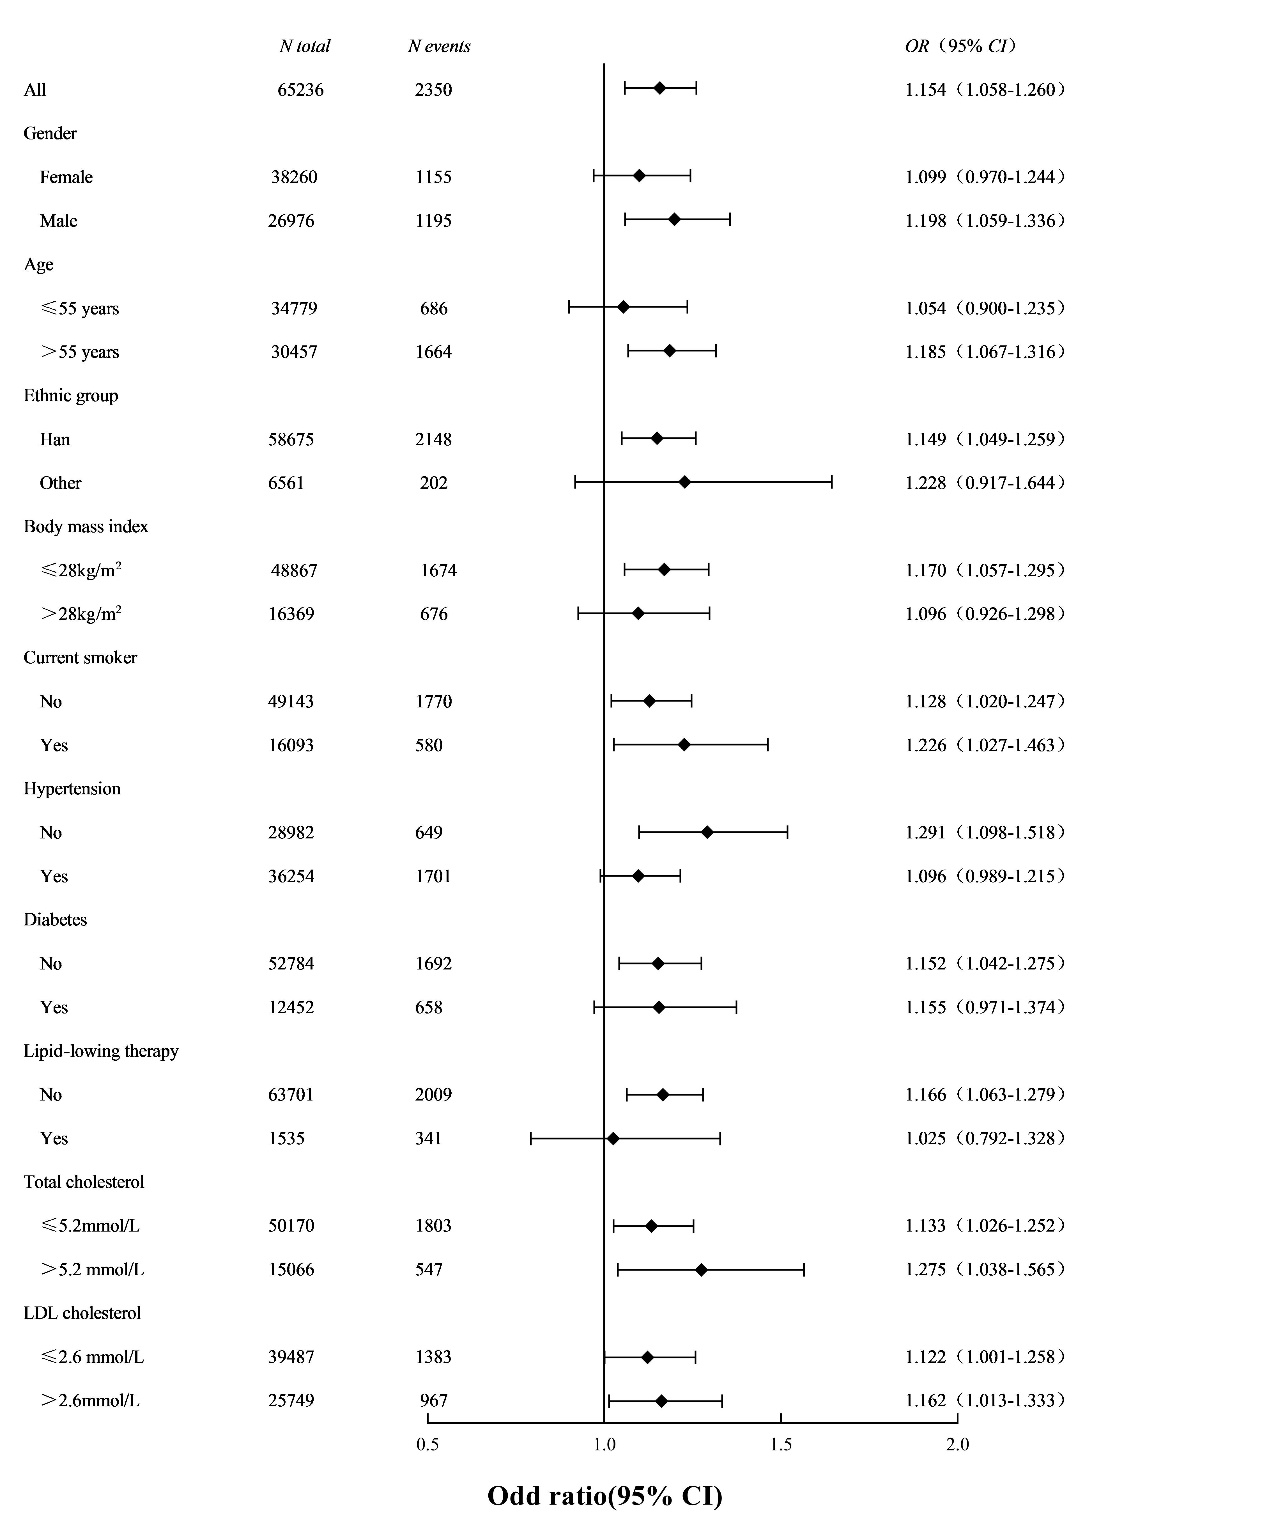


Figure S3 Risk of ischemic cardiovascular disease stratified by cardiovascular risk factors

The reference group is individuals with low concentrations of both (RC≤0.6mmol/L)
